# Supplementary material for: A supramolecular assembly and complexes of zinc 2-hydoxy-3-naphthoate
Source: Royal Society of Chemistry journal article supplement (doi:10.1039/c2ra22811d), 2012-11-21

## Supporting Information:

The aromatic region of the  $^1\text{H}$ NMR (400 MHz, DMSO- $d_6$ ) of **1** is shown below:

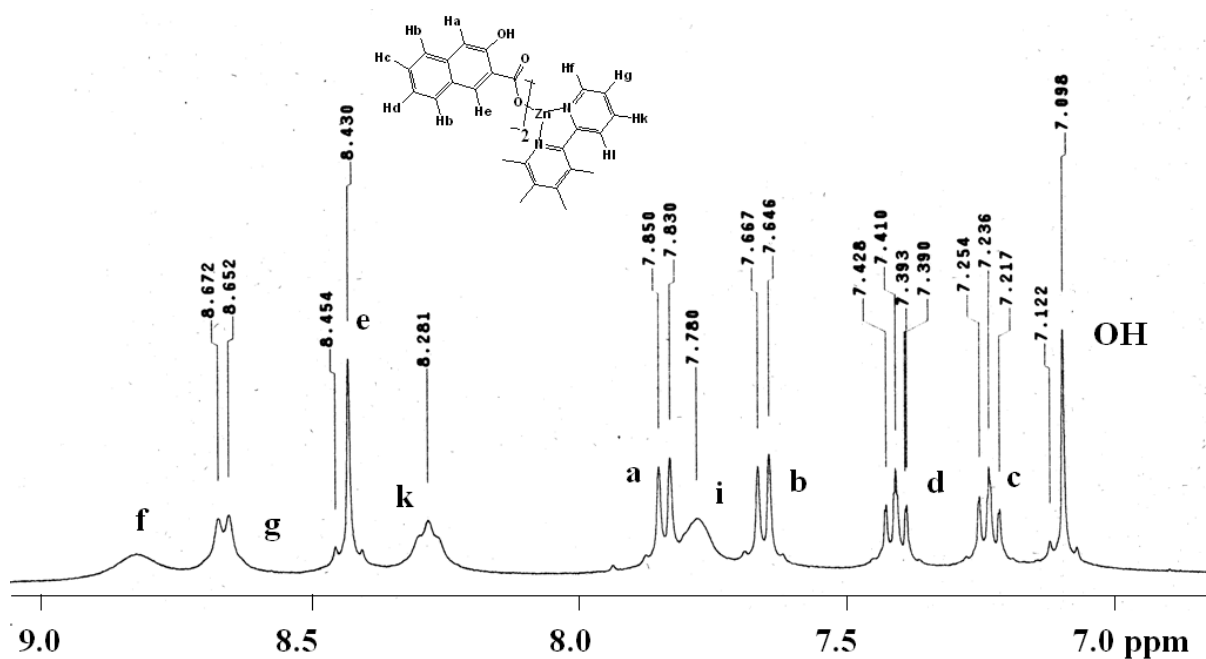

The aromatic region of the  $^1\text{H}$ NMR (400 MHz, dmsO- $d_6$ ) of **2** is shown below:

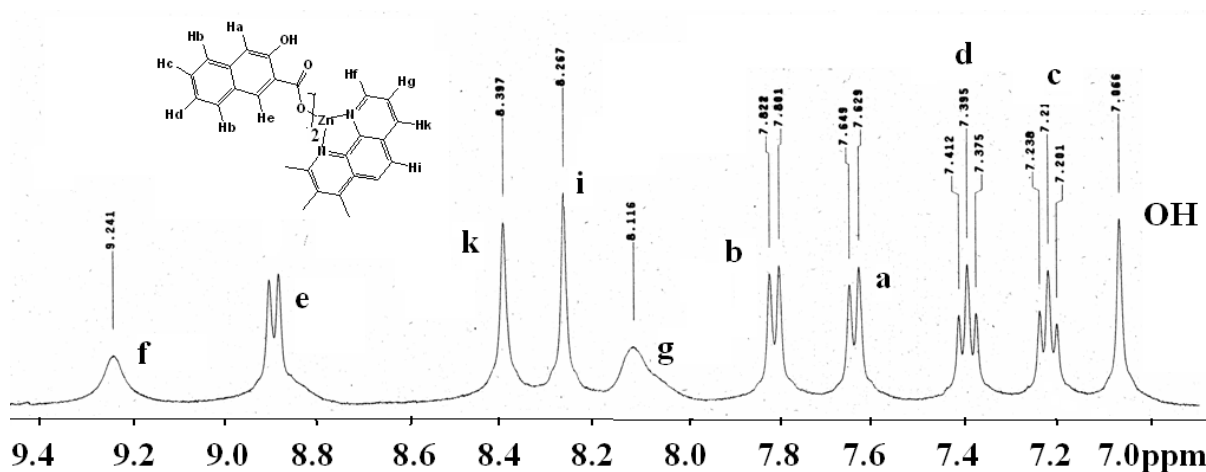

The aromatic as well as aliphatic region of the  $^1\text{H}$ NMR (400 MHz, dmsO- $d_6$ ) of **3** is shown below:

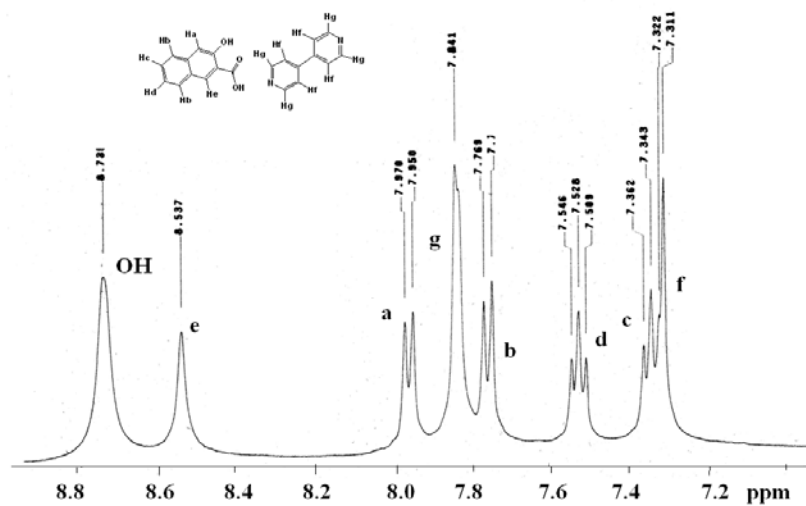

The aromatic and aliphatic region of the  $^1\text{H}$ NMR (400 MHz, DMSO- $d_6$ ) of **4** is shown below:

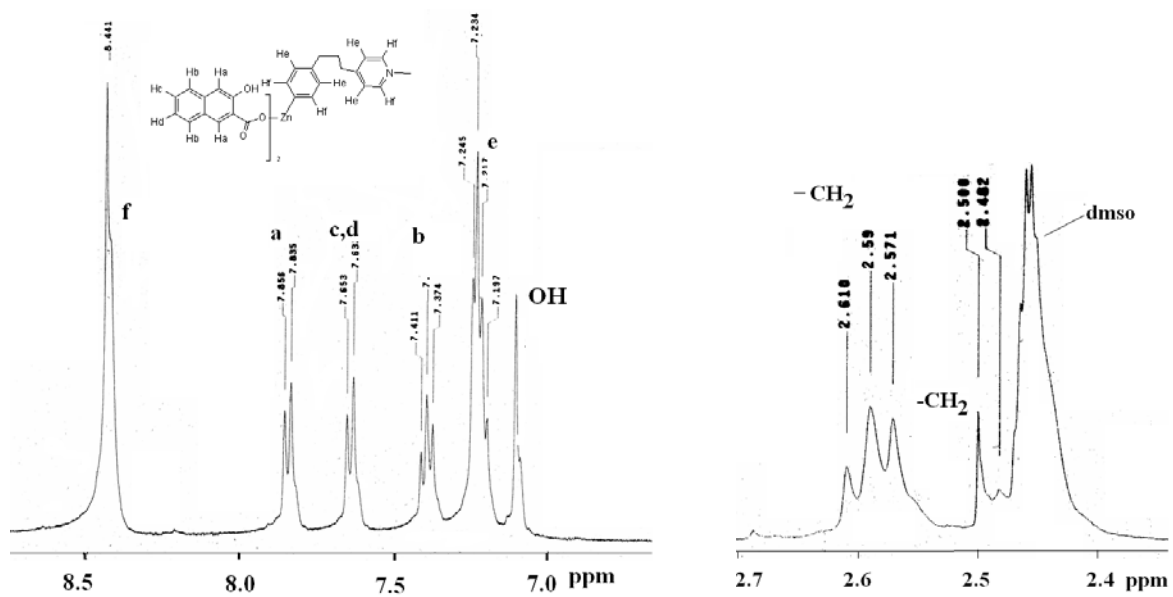

Supplement: c2ra22811d.pdf [file c2ra22811d.pdf]
